# Supplementary material for: Trichophyton rubrum Azole Resistance Mediated by a New ABC Transporter, TruMDR3
Source: PubMed Central journal article supplement (PMC6811443; doi:10.1128/aac.00863-19), 2019-10-22
Supplement: AAC.00863-19-s0001.pdf [file AAC.00863-19-s0001.pdf]

**TABLE S1:** Identification of potential *T. rubrum* (strain ATCC MYA-4607 / CBS 118892) genes coding for proteins containing an MFS transporter signature in UniProtKB

| <i>T. rubrum</i> (strain ATCC MYA-4607 / CBS 118892) | * <i>T. benhamiae</i> (strain ATCC MYA-4681 / CBS 112371) |
|------------------------------------------------------|-----------------------------------------------------------|
| TERG_02599/11867/868                                 | ARB_02522                                                 |
| TERG_12004                                           | ARB_04870                                                 |
| TERG_00675                                           | ARB_05819                                                 |
| TERG_12306                                           | ARB_05875                                                 |
| TERG_05381                                           | ARB_03314                                                 |
| TERG_00820                                           | ARB_07809                                                 |
| TERG_00215                                           | ARB_05391                                                 |
| TERG_07783                                           | ARB_06729                                                 |
| TERG_03719                                           | ARB_00611                                                 |
| TERG_05391                                           | ARB_03323                                                 |
| TERG_02614                                           | ARB_02535                                                 |
| TERG_07492                                           | ARB_00109                                                 |
| TERG_12412                                           | ARB_04257                                                 |
| TERG_08394                                           | ARB_00505                                                 |
| TERG_12018                                           | ARB_04782                                                 |
| TERG_06400                                           | ARB_04315                                                 |
| TERG_12178/179                                       | ARB_01295                                                 |
| TERG_04094                                           | ARB_07106                                                 |
| TERG_05575                                           | ARB_05866                                                 |
| TERG_06880                                           | ARB_00250                                                 |
| TERG_04400                                           | ARB_00828                                                 |
| TERG_04625                                           | ARB_02660                                                 |
| TERG_08244                                           | ARB_01482                                                 |

|                |           |
|----------------|-----------|
| TERG_11942     | ARB_05236 |
| TERG_05532     | ARB_05909 |
| TERG_05810     | ARB_06185 |
| TERG_00348     | ARB_05519 |
| TERG_03813     | ARB_00700 |
| TERG_11583/584 | ARB_05675 |
| TERG_04308     | ARB_00746 |
| TERG_07230     | ARB_02318 |
| TERG_07539     | ARB_00157 |
| TERG_01336     | ARB_01789 |
| TERG_03066     | ARB_05241 |
| TERG_01255     | ARB_07613 |
| TERG_03216     | ARB_05112 |
| TERG_05526     | ARB_05915 |
| TERG_04949     | ARB_03854 |
| TERG_01456     | ARB_02717 |
| TERG_05582     | ARB_05855 |
| TERG_04626     | ARB_02659 |
| TERG_02583     | ARB_02508 |
| TERG_05429     | ARB_05999 |
| TERG_05055     | ARB_03016 |
| TERG_07040     | ARB_01843 |
| TERG_01532     | ARB_03915 |
| TERG_03055     | ARB_05252 |
| TERG_02689     | ARB_03524 |
| TERG_01437     | ARB_01703 |
| TERG_00574     | ARB_05724 |
| TERG_00162     | ARB_02036 |

|                |           |
|----------------|-----------|
| TERG_01820     | ARB_06345 |
| TERG_00916     | ARB_01218 |
| TERG_08400     | ARB_00499 |
| TERG_05125     | ARB_03082 |
| TERG_05537     | ARB_05905 |
| TERG_02992     | ARB_05305 |
| TERG_00008     | ARB_02967 |
| TERG_12369/370 | ARB_04593 |
| TERG_02822     | ARB_07968 |
| TERG_01053     | ARB_03475 |
| TERG_11599/600 | ARB_05759 |
| TERG_06717     | ARB_02904 |
| TERG_06093     | ARB_04607 |
| TERG_05351     | ARB_03288 |
| TERG_08336     | ARB_02788 |
| TERG_02783     | ARB_07927 |
| TERG_05547     | ARB_05894 |
| TERG_07884     | ARB_06631 |
| TERG_05199     | ARB_03142 |
| TERG_05891     | ARB_06266 |
| TERG_04711     | ARB_03753 |
| TERG_03240     | ARB_05092 |
| TERG_00776     | ARB_07765 |
| TERG_02295     | ARB_07420 |
| TERG_05104     | ARB_03065 |
| TERG_05466     | ARB_05967 |
| TERG_07298     | ARB_00398 |
| TERG_02844     | ARB_07988 |

|              |               |
|--------------|---------------|
| TERG_04399   | ARB_00827     |
| TERG_05309   | ARB_03247/248 |
| TERG_02323   | ARB_07396     |
| TERG_02369   | ARB_07356     |
| TERG_07170   | ARB_02263     |
| TERG_00163   | ARB_02037     |
| TERG_01634   | ARB_01016     |
| TERG_03011 ? | ARB_05289     |
| TERG_05632   | ARB_03543     |
| TERG_07015   | ARB_01819     |
| TERG_07418   | ARB_00048     |
| TERG_04875   | ARB_01436     |
| TERG_01628   | ARB_01022     |
| TERG_03984   | ARB_04003     |
| TERG_05601   | ARB_05841     |
| TERG_02543   | ARB_02464     |
| TERG_00706   | ARB_07695     |
| TERG_01489   | ARB_01528     |
| TERG_02505   | ARB_07219     |
| TERG_02961   | ARB_05332     |
| TERG_01581   | ARB_01061     |
| TERG_05895   | ARB_06270     |
| TERG_04182   | ARB_07021     |
| TERG_04280   | ARB_06932     |
| TERG_01138   | ARB_07500     |
| TERG_01748   | ARB_00908     |
| TERG_03250   | ARB_05083     |
| TERG_08615   | ARB_06758     |

|                |               |
|----------------|---------------|
| TERG_06515     | ARB_04208     |
| TERG_02111     | ARB_06624     |
| TERG_07250     | ARB_02337     |
| TERG_06838     | ARB_00288     |
| TERG_03438     | ARB_04908     |
| TERG_12725/726 | ARB_07858     |
| TERG_08619     | ARB_07866     |
| TERG_05153     | ARB_03107     |
| TERG_06837     | ARB_00289     |
| TERG_08059     | ARB_02098     |
| TERG_05342     | ARB_03279     |
| TERG_01623     | ARB_01027     |
| TERG_03965     | ARB_03984/985 |
| TERG_01655     | ARB_00993     |
| TERG_08820     | ARB_02699     |
| TERG_04931     | ARB_03838     |
| TERG_01481     | ARB_01519     |
| TERG_04555     | ARB_06847     |
| TERG_03012     | ARB_05288     |
| TERG_02616     | ARB_02537     |
| TERG_02912     | ARB_08054     |
| TERG_02244     | ARB_02435     |
| TERG_02545     | ARB_02467     |
| TERG_05719     | ARB_06094     |
| TERG_05258     | ARB_03197     |
| TERG_08620     | ARB_07865     |
| TERG_04764     | ARB_01340     |
| TERG_06549     | ARB_04173     |

|                |               |
|----------------|---------------|
| TERG_06650     | ARB_04081     |
| TERG_06850     | ARB_00278     |
| TERG_02333     | ARB_07387     |
| TERG_02283     | ARB_07432     |
| TERG_01928     | ARB_06441     |
| TERG_02265     | ARB_02449     |
| TERG_01503     | ARB_01540     |
| TERG_08700     | ARB_01015     |
| TERG_06679     | ARB_07177     |
| TERG_03222     | ARB_05108     |
| TERG_03754     | ARB_00644/645 |
| TERG_03174     | ARB_05150     |
| TERG_05805     | ARB_06180     |
| TERG_12235/236 | ARB_03026     |
| TERG_04805     | ARB_01378     |
| TERG_12504     | ARB_01831     |
| TERG_08095     | ARB_02130     |
| TERG_04048     | ARB_04075     |
| TERG_03579     | ARB_04786     |
| TERG_02798     | ARB_07943     |
| TERG_05144     | ARB_03099     |
| TERG_05202     | ARB_03145     |
| TERG_04419     | ARB_00852     |
| TERG_01484     | ARB_01522     |
| TERG_11943     | ARB_05235     |
| TERG_12418     | -             |
| TERG_05549     | -             |
| TERG_06076     | -             |

|            |   |
|------------|---|
| TERG_02654 | - |
| TERG_05248 | - |
| TERG_03451 | - |
| TERG_04226 | - |
| TERG_12503 | - |
| TERG_07654 | - |
| TERG_01912 | - |

\* Closest homologs in *Trichophyton benhamiae* (formerly *Arthroderma benhamiae*) strain ATCC MYA-4681/CBS 112371 are also indicated when found.

**TABLE S2:** Identification of potential *T. rubrum* (strain ATCC MYA-4607 / CBS118892) genes coding for proteins containing an ABC transporter signature in UniProtKB

| <i>T. rubrum</i> (strain ATCC MYA-4607 / CBS 118892) | <i>*T. benhamiae</i> (strain ATCC MYA-4681 / CBS 112371) | ABC Family |
|------------------------------------------------------|----------------------------------------------------------|------------|
| TERG_12478                                           | ARB_00234                                                | ABCC       |
| TERG_12475                                           | ARB_00239                                                | ABCG       |
| TERG_03793                                           | ARB_00681                                                | **ABCF     |
| TERG_04309                                           | ARB_00747                                                | ABCB       |
| TERG_04323                                           | ARB_00761                                                | ABCC       |
| TERG_00955                                           | ARB_01184                                                | ABCG       |
| TERG_04806                                           | ARB_01379                                                | ABCG       |
| TERG_04848                                           | ARB_01416                                                | ABCC       |
| TERG_08693                                           | ARB_01506/507                                            | ABCB       |
| TERG_01443                                           | ARB_01699                                                | ABCC       |
| TERG_01420                                           | ARB_01716                                                | n.d        |
| TERG_12650/651                                       | ARB_02150                                                | ABCC       |
| TERG_08130                                           | ARB_02160                                                | **ABCF     |
| TERG_02186                                           | ARB_02379                                                | ABCG       |
| TERG_04628                                           | ARB_02657                                                | **ABCF     |
| TERG_08299                                           | ARB_02755                                                | ABCC       |
| TERG_05126                                           | ARB_03083                                                | ABCB       |
| TERG_05254                                           | ARB_03193                                                | **ABCE     |
| TERG_03878                                           | ARB_03588                                                | ABCD       |
| TERG_04952                                           | ARB_03857                                                | ABCB       |
| TERG_03933                                           | ARB_03963                                                | ABCC       |
| TERG_03988                                           | ARB_04007                                                | **ABCF     |
| TERG_06399                                           | ARB_04316                                                | ABCB       |



|              |           |        |
|--------------|-----------|--------|
| TERG_06212   | ARB_04497 | ABCB   |
| TERG_12373   | ARB_04544 | ABCC   |
| TERG_00286   | ARB_05462 | ABCB   |
| TERG_00402   | ARB_05580 | ABCB   |
| TERG_05538   | ARB_05904 | ABCB   |
| TERG_05776   | ARB_06148 | ABCD   |
| TERG_07801 ? | ARB_06709 | ABCB   |
| TERG_08613   | ARB_06760 | ABCB   |
| TERG_08591   | ARB_06781 | ABCB   |
| TERG_02508   | ARB_07216 | ABCG   |
| TERG_01131   | ARB_07493 | ABCB   |
| TERG_01274   | ARB_07630 | **ABCF |
| TERG_11627   | ARB_07762 | ABCB   |
| TERG_08751   | ARB_07873 | ABCB   |
| TERG_04224   | -         | ABCA   |
| TERG_04227   | -         | ABCG   |

\*Closest homologs in *T. benhamiae* (formerly *Arthroderma benhamiae*) strain ATCC MYA-4681 / CBS 112371 are also indicated when found.

\*\*Families ABCE and ABCF do not have the transmembrane domains and are probably not transmembrane transporters.

**TABLE S3:** Gene model of *TruMDR1-5* and of closest *A. fumigatus* homologs.

| <i>T. rubrum</i> ABC transporter | Size in aa | Position of introns*                                | Closest homologue of <i>A. fumigatus</i> | Size in aa | Amino acid positions corresponding to introns* | Sequence identities ** |
|----------------------------------|------------|-----------------------------------------------------|------------------------------------------|------------|------------------------------------------------|------------------------|
| TERG_02508 / <i>TruMDR1</i>      | 1270       | 596<br>597<br>708<br>1236<br>1566                   | AFUA_3G07300 / <i>atrI</i>               | 1472       | 998                                            | 58.6% on 1445 aa       |
| TERG_08613 / <i>TruMDR2</i>      | 1331       | 114                                                 | AFUA_5G06070 / <i>mdr1</i> / <i>abcA</i> | 1349       | 129<br>1231                                    | 68.5% on 1318 aa       |
| TERG_02186 / <i>TruMDR3</i>      | 1503       | 195<br>373<br>1197                                  | AFUA_2G15130 / <i>abcA_2</i>             | 1449       | 202<br>706<br>1204<br>1359                     | 71.5% on 1085 aa       |
| TERG_07801 / <i>TruMDR4</i>      | 1366       | 17<br>337                                           | AFUA_1G12690 / <i>mdr4</i>               | 1330       | 23<br>62<br>529<br>1083                        | 60.0% on 1317 aa       |
| TERG_04952 / <i>TruMDR5</i>      | 1292       | 63<br>90<br>126<br>139<br>345<br>488<br>964<br>1008 | AFUA_5G06070 / <i>mdr1</i> / <i>abcA</i> | 1349       | 129<br>1231                                    | 40.7% on 995 aa        |

\* Amino acid positions in the sequence of transporters corresponding to the positions of introns in coding genes. The amino acid positions referring to conserved introns are marked in bold.

\*\* Protein sequence identities are indicated with the length of the identical parts of the proteins.

**TABLE S4: Primers used in this study**

| *Primers | Oligonucleotide sequence                                     | Location                                             | PCR product size with cloning sites<br>Purpose      |
|----------|--------------------------------------------------------------|------------------------------------------------------|-----------------------------------------------------|
| P1       | 5' -ATGGCCGTGCTCACAGTGG-3'                                   | TERG_02984                                           | 1615 bp                                             |
| P2       | 5' -TCAACGTGAATTAGAACGTCG-3'                                 | complement of<br>TERG_02984                          |                                                     |
| P3       | 5' -GTTGGATCCAACATGGTGTCTGACATCGAGAAG-3'                     | TERG_04626                                           | 1835 bp                                             |
| P4       | 5' -CTTGCGGCCGCTACATATCTCGCTCCATTTC-3'                       | Complement of<br>TERG_04626                          | <i>Bam</i> HI--- <i>Not</i> I<br>Cloning in pYES2   |
| P5       | 5' -GTTAGATCTCAACATGGCCACTTTTCTTCCCAGC-3'                    | TERG_05582                                           | 1734 bp                                             |
| P6       | 5' -CTTGCGGCCGCTACTCCGCAAATCGACTTCTT-3'                      | Complement of<br>TERG_05582                          | <i>Bgl</i> III--- <i>Not</i> I<br>Cloning in pYES2  |
| P7       | 5' -GTTAGATCTCAACATGGCGAATTCATCCGGCTCGG-3'                   | TERG_07884                                           | 1638 bp                                             |
| P8       | 5' -CTTGCGGCCGCTATTTCTTTTCAGAGTTTTTC-3'                      | Complement of<br>TERG_07884                          | <i>Bgl</i> III--- <i>Not</i> I<br>Cloning in pYES2  |
| P9       | 5' -GTTTGGATCCAACATGGTTGAACCGAGCGAGAAAC-3'                   | TERG_08613                                           | 383 bp                                              |
| P10      | 5' -ATGTGCCGGCGAGGGAACCAAAAAGGACTGTAAATAGC<br>GGTAGGGCGGC-3' | Complement of<br>TERG_08613                          | <i>Bam</i> HI--- <i>Ngo</i> MIV<br>Cloning in pYES2 |
| P11      | 5' -GGTCCCTCGCCGGCACATTTTC-3'                                | TERG_08613                                           | 1708 bp                                             |
| P12      | 5' -CTTTCTCGAGCACCGCCTCATCCTCGG-3'                           | Complement of<br>TERG_08613                          | <i>Ngo</i> MIV --- <i>Xho</i> I<br>Cloning in pYES2 |
| P13      | 5' -GGATGAGGCGGTGCTCGAGAAGGAGAAGG-3'                         | TERG_08613                                           | 1972 bp                                             |
| P14      | 5' -CTATGCGGCCGCTTAATGAGTTTTCTCAAGGCTC-3'                    | Complement of<br>TERG_07884                          | <i>Xho</i> I--- <i>Not</i> I<br>Cloning in pYES2    |
| P15      | 5' -TGTTGGTGATGAGGCACAGT-3'                                  | TERG_06637:                                          | 89 bp                                               |
| P16      | 5' -CCATGTCATCCCAGTTTGTG-3'                                  | <i>TruACT</i> (actin)<br>Complement of<br>TERG_06637 | qRT-PCR                                             |

|     |                                 |                                |         |
|-----|---------------------------------|--------------------------------|---------|
| P17 | 5' -GCGTGACCCAGCCAACA-3'        | TERG_04402:<br><i>TruGAPDH</i> | 114 bp  |
| P18 | 5' -TTGGCACCTCCCTTCAAGT-3'      | Complement of<br>TERG_04402    | qRT-PCR |
| P19 | 5' -CCTAATGCCCTTCCTGGATT-3'     | TERG_02508:<br><i>TruMDR1</i>  | 130 bp  |
| P20 | 5' -AAATTGCCAGCTCGTTCTGT-3'     | Complement of<br>TERG_02508    | qRT-PCR |
| P21 | 5' -TGA CTCTGAATCCGAAAAGG-3'    | TERG_08613:<br><i>TruMDR2</i>  | 83 bp   |
| P22 | 5' -GTCGGTGAGCAACAGCAATA-3'     | Complement of<br>TERG_08613    | qRT-PCR |
| P23 | 5' -TCACTGGTGAAATGCTCGTTGACG-3' | TERG_02186:<br><i>TruMDR3</i>  | 142 bp  |
| P24 | 5' -GGTTGACGGAGCAAGGCACTG-3'    | Complement of<br>TERG_02186    | qRT-PCR |
| P25 | 5' -GGAAATTGAGCTTCGAGACG-3'     | TERG_07801:<br><i>TruMDR4</i>  | 113 bp  |
| P26 | 5' -TTCCAACGATAGCAGTGTGC-3'     | Complement of<br>TERG_07801    | qRT-PCR |
| P27 | 5' -ATCGGGCACTGCTTTGCCTC-3'     | TERG_04952:<br><i>TruMDR5</i>  | 181 bp  |
| P28 | 5' -GCAGATGGTATGGATGTAGACG-3'   | Complement of<br>TERG_04952    | qRT-PCR |
| P29 | 5' -ATTATCGGCCGTGCAGTTGC-3'     | TERG_01623:<br><i>TruMFS1</i>  | 147 bp  |
| P30 | 5' -ACCTGCCACAGAGGCAATACC-3'    | Complement of<br>TERG_01623    | qRT-PCR |
| P31 | 5' -GCTGATGCCAATGCCATGGAG-3'    | TERG_08336:<br><i>TruMFS2</i>  | 178 bp  |

|     |                                             |                             |                                                                                         |
|-----|---------------------------------------------|-----------------------------|-----------------------------------------------------------------------------------------|
| P32 | 5' -TCGGGTTTCGAGGATCGCTTGG-3'               | Complement of<br>TERG_08336 | qRT-PCR                                                                                 |
| P33 | 5' -TGTACTAGTACCGTGGCCATCGTGTAGAGGATATT-3'  |                             | 2627 bp                                                                                 |
| P34 | 5' -TCGGGGGCCCCGCTGCTGATCTCTATGGACGATAGC-3' |                             | Amplification of <i>TruMDR3</i> -5'-UTR                                                 |
| P35 | 5' -AAAGGGATCCTTCTATTTCAATTGGAATACTCGAT-3'  |                             | 2407 bp                                                                                 |
| P36 | 5' -CGATGGTACCAAACTCGAGACTCAACTCTCACCC-3'   |                             | Amplification of <i>TruMDR3</i> -3'-UTR<br>Amplification of a hybridization probe (P35) |
| P37 | 5' -GACCGAGGCATCAGGGATCTGAGCAGGCAGGTTGG-3'  |                             | Inactivation of the internal <i>ApaI</i> ,                                              |
| P38 | 5' -CCAACCTGCCTGCTCAGATCCCTGATGCCTCGGTC-3'  |                             | <i>BamHI</i> , <i>KpnI</i> or <i>SpeI</i> sites within the                              |
| P39 | 5' -CAGCGTATGTTTCAGGGTCCAATCATATGCCATCGA-3' |                             | 5'- or 3'-UTR by overlap extension                                                      |
| P40 | 5' -TCGATGGCATATGATTGGACCCTGAACATACGCTG-3'  |                             | PCR                                                                                     |
| P41 | 5' -TGTCAACAAACTAACTGGTTAACCTTTCGTCCGAT-3'  |                             |                                                                                         |
| P42 | 5' -ATCGGACGAAAGGTTAACCAGTTAGTTTGTGACA-3'   |                             |                                                                                         |
| P43 | 5' -TCGTTTCATGGACAATGTGAAAGCCACCCATGTGTT-3' |                             | 509 bp<br>Amplification of a hybridization probe                                        |
| P44 | 5' -TTTTGGGCCCCAGAAGATGATATTGAAGGAGCACT-3'  |                             | 1451 bp                                                                                 |
| P45 | 5' -AAAAGGATCCAGATGATTCATGA-3'              |                             | Amplification of <i>nptII</i> cassette<br>( <i>P<sub>trpC</sub>-nptII-TcgrA</i> )       |

\*Primers P1 and P2 were used for *T. rubrum cyp51A* (TERG\_02984) amplification and sequencing. Primers P3 to P8 were used for amplification of genes to be expressed in *S. cerevisiae*. CAAC Kozak sequences are underlined. P9 to P14 were used for a *TruMDR2* (TERG\_08613) cDNA fragment synthesis. P15 to P32 were used for qRT-PCR experiments. P33 to P45 were used for construction of *TruMDR3*-targeting vector pAg1-*TruMDR3*/T and *TruMDR3* locus-disruption experiments in TIMM20092.

**TABLE S5:** Plasmids used for constructing the *TruMDR3*-targeting vector pAg1-*TruMDR3*/T

| Plasmid                 | Description                                                                                                                                                                                                                                                                                                                                                                                                                                                                                                                                                                                                 | Source     |
|-------------------------|-------------------------------------------------------------------------------------------------------------------------------------------------------------------------------------------------------------------------------------------------------------------------------------------------------------------------------------------------------------------------------------------------------------------------------------------------------------------------------------------------------------------------------------------------------------------------------------------------------------|------------|
| pAg1                    | A streamlined version of the binary vector pBIN19 containing sequences necessary for replication in <i>E. coli</i> and <i>A. tumefaciens</i> ( <i>oriV</i> , <i>trfA</i> ), <i>E. coli</i> neomycin phosphotransferase ( <i>nptII</i> ), and the transferable DNA (T-DNA) region. A multiple cloning site was placed within the T-DNA region.                                                                                                                                                                                                                                                               | 1          |
| pSP72-PcFLP             | pSP72 (Promega) containing the 5'-UTR of <i>Trichophyton mentagrophytes Ku80</i> ( <i>TmKu80</i> ) gene (AB427108) (1.5 kb), the FLP recombination target (5'-FRT), <i>Aspergillus nidulans trpC</i> promoter ( <i>PtrpC</i> ) (AN0648), <i>nptII</i> , <i>A. fumigatus cgrA</i> terminator ( <i>TcgrA</i> ) (AFUA_8G02750), <i>T. rubrum ctr4</i> promoter ( <i>Pctr4</i> ) (TERG_01401), <i>Penicillium chrysogenum</i> -optimized FLP recombinase ( <i>Pcflp</i> ) gene, <i>Cryptococcus neoformans trp1</i> terminator ( <i>Ttrp1</i> ) (M74901), 3'-FRT and the 3'-UTR of <i>TmKu80</i> gene (1.5 kb). | This study |
| pAg1- <i>TruMDR3</i> /T | <i>TruMDR3a</i> fragment [the 5'-UTR of <i>TruMDR3</i> gene (TERG_02186); 2.6 kb], <i>PtrpC</i> , <i>nptII</i> , <i>TcgrA</i> , <i>TruMDR3b</i> fragment (the 3'-UTR of <i>TruMDR3</i> gene; 2.4 kb)                                                                                                                                                                                                                                                                                                                                                                                                        | This study |

## **Reference**

1. Zhang A, Lu P, Dahl-Roshak AM, Paress PS, Kennedy S, Tkacz JS, An Z. 2003. Efficient disruption of a polyketide synthase gene (pks1) required for melanin synthesis through *Agrobacterium*-mediated transformation of *Glarea lozoyensis*. *Mol Genet Genomics* 268:645-655.
